# Supplementary material for: Green Extraction Strategy Using Bio-Based Aqueous Biphasic Systems for Polyphenol Valorization from Grape By-Product
Source: MDPI journal article supplement (doi:10.3390/foods13060954), 2024-03-21
Supplement: s1 [file s1]

## Supporting Information

### Green Extraction Strategy Using Bio-Based Aqueous Biphasic Systems for Polyphenol Valorization from Grape By-Product

Aleksandra Dimitrijević <sup>1,\*</sup>, Slađana Marić <sup>1</sup>, Ana Jocić <sup>1</sup>, Danijela Tekić <sup>1</sup>, Jasmina Mušović <sup>1</sup> and Joana S. Amaral <sup>2,3</sup>

<sup>1</sup> Vinča Institute of Nuclear Sciences—National Institute of the Republic of Serbia, University of Belgrade, Mike Petrovica Alasa 12–14, 11000 Belgrade, Serbia; sladjana.maric@vin.bg.ac.rs (S.M.); ana.jocic@vin.bg.ac.rs (A.J.); danijela.tekic@vin.bg.ac.rs (D.T.); jasmina.musovic@vin.bg.ac.rs (J.M.)

<sup>2</sup> Centro de Investigação de Montanha (CIMO), Instituto Politécnico de Bragança, Campus de Santa Apolónia, 5300-253 Bragança, Portugal; jamaral@ipb.pt

<sup>3</sup> Laboratório Associado para a Sustentabilidade e Tecnologia em Regiões de Montanha (SusTEC), Instituto Politécnico de Bragança, Campus de Santa Apolónia, 5300-253 Bragança, Portugal

**\*Corresponding author:** Aleksandra Dimitrijević – daleksandra@vin.bg.ac.rs

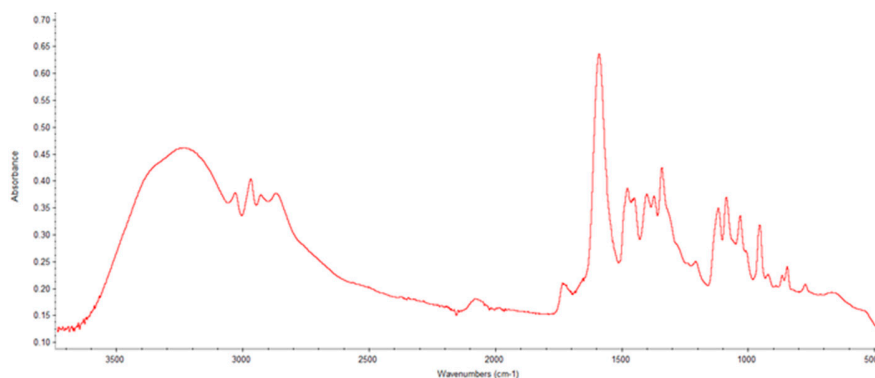

**Figure S1a.** FTIR spectra of the synthesized [Ch][Lac].

IR (neat): 3246 (OH); 2968; 1589 (COO); 1477 (CH<sub>3</sub>); 1375 (CH<sub>3</sub>); 1087 (C-CH<sub>3</sub>); 954 (C-C-O).

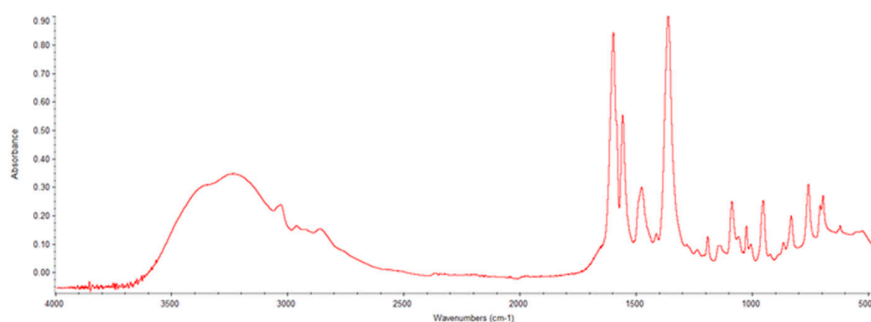

**Figure S1b.** FTIR spectra of the synthesized [Ch][Nic].

IR (neat): 3232 (OH); 1598 (C=C); 1559 (NH); 1478 (CH<sub>3</sub>); 1362 (COO); 1192 (stretching C-OH, from Ph-OH); 1088 (C-C-N); 1025; 953 (C-C-O); 832 (C-C); 758, 695.

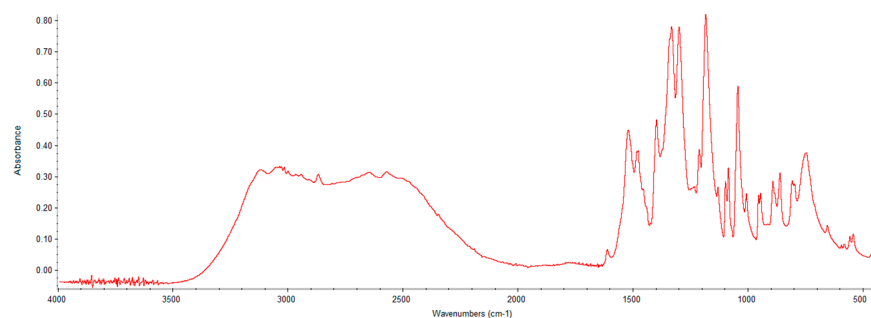

**Figure S1c.** FTIR spectra of the synthesized [Ch][Gal].

IR (neat): 3038 (OH); 2572, 1522 (COO); 1332 (COO<sup>-</sup>); 1184 (CN); 1044; 945; 861; 758.

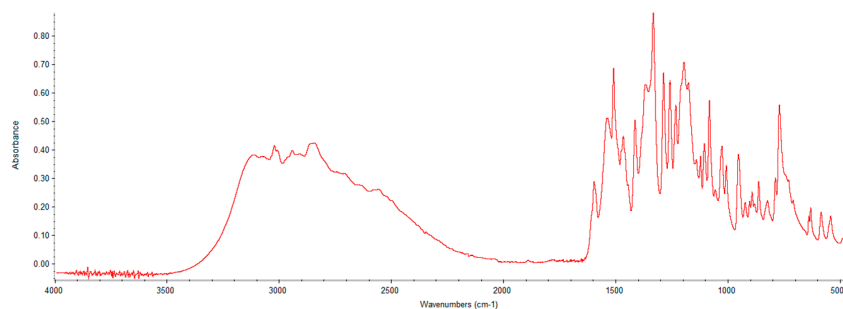

**Figure S1d.** FTIR spectra of the synthesized [Ch][Van].

IR (neat): 3022 (OH); 2845; 1534 (COO); 1333 (COO); 1196 (CN); 1088; 1083; 1027; 771; 632.

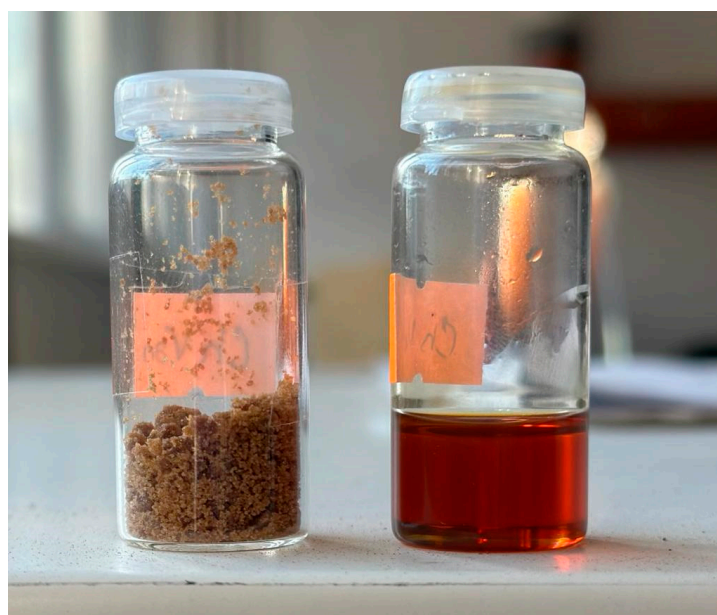

**Figure S2.** Synthesized [Ch][Gal] (left) and [Ch][Lac] (right).

### Determination of the phase diagrams of ABS

The phase diagrams of ABS composed of each salt/IL, PPG400 and water were determined by applying the cloud point titration method at  $(25 \pm 1)^\circ\text{C}$  and atmospheric pressure (0.1 MPa) following established protocol [1]. The obtained experimental solubility data from the biphasic phase diagrams were fitted using the empirical Merchuk equation:

$$Y = A \exp [(BX^{0.5}) - (CX^3)] \quad (\text{S1})$$

where Y and X are, respectively, the PPG400 and IL/salt weight fractions percentages; and A, B, and C are regression parameters determined using the OriginPro 8.5 software.

Tie lines (TLs) were determined by the lever–arm rule according to Merchuk et al. [2] The following system of four equations (Egs. S2-S5) with four unknown values was solved applying the MathCad 15.0 software:

$$Y_{\text{PPG400}} = A \exp[(BX_{\text{PPG400}}^{0.5}) - (CX_{\text{PPG400}}^3)] \quad (\text{S2})$$

$$Y_{\text{IL}} = A \exp[(BX_{\text{IL}}^{0.5}) - (CX_{\text{IL}}^3)] \quad (\text{S3})$$

$$Y_{\text{PPG400}} = \left(\frac{Y_{\text{M}}}{\alpha}\right) - \left(\frac{(1-\alpha)}{\alpha}\right) Y_{\text{IL}} \quad (\text{S4})$$

$$X_{\text{PPG400}} = \left(\frac{X_{\text{M}}}{\alpha}\right) - \left(\frac{(1-\alpha)}{\alpha}\right) X_{\text{IL}} \quad (\text{S5})$$

where subscripts PPG400, IL, and M correspond to the PPG400-rich phase, the IL-rich phase and the mixture, respectively;  $\alpha$  is the ratio between the mass of the top phase and the total mass of the mixture. The system solution results in the composition (wt%) of the IL and PPG400 in the top and bottom phases. Each tie-line length (TLL) was calculated using the equation:

$$\text{TLL} = \sqrt{(X_{\text{PPG400}} - X_{\text{IL}})^2 + (Y_{\text{PPG400}} - Y_{\text{IL}})^2} \quad (\text{S6})$$

**pH measurements.** pH values of ABS were measured using Orion-Star A111 pH Benchtop Meter Kit at  $25 \pm 1$  °C and within  $\pm 0.01$  pH units. The calibration of the pH meter was carried out with three standard buffers (pH values of 10.10, 7.00 and 4.01).

**Table S1.** Experimental binodal mass fraction data for the salt/IL (X) + PPG400 (Y) + H<sub>2</sub>O ABS at 25°C and at p = 0.1 MPa.

| [Ch][DHP] |       | [Ch][DHCit] |       | [Ch]Cl |       |
|-----------|-------|-------------|-------|--------|-------|
| 100·X     | 100·Y | 100·X       | 100·Y | 100·X  | 100·Y |
| 2.50      | 51.67 | 5.32        | 54.32 | 6.73   | 41.81 |
| 2.84      | 46.29 | 6.49        | 50.83 | 7.29   | 40.47 |
| 3.49      | 40.78 | 7.40        | 47.45 | 8.08   | 37.32 |
| 4.52      | 36.51 | 7.81        | 45.21 | 8.55   | 32.98 |
| 4.66      | 35.08 | 8.81        | 42.69 | 8.94   | 31.56 |
| 4.90      | 34.62 | 9.64        | 40.45 | 9.84   | 29.34 |
| 5.08      | 32.60 | 12.79       | 33.69 | 10.59  | 27.67 |
| 5.25      | 32.26 | 14.94       | 31.05 | 11.11  | 25.43 |
| 5.46      | 31.30 | 16.11       | 28.18 | 11.70  | 24.47 |
| 5.74      | 30.50 | 16.61       | 26.71 | 12.22  | 23.16 |
| 5.81      | 29.82 | 17.85       | 24.69 | 12.97  | 21.85 |

|       |       |       |       |       |       |
|-------|-------|-------|-------|-------|-------|
| 6.01  | 29.01 | 18.35 | 23.33 | 13.31 | 21.27 |
| 6.18  | 28.05 | 19.34 | 22.36 | 15.57 | 17.85 |
| 6.70  | 25.87 | 20.25 | 21.44 | 16.51 | 16.71 |
| 7.26  | 23.56 | 20.37 | 20.87 | 17.19 | 15.56 |
| 7.65  | 21.82 | 20.77 | 20.52 | 17.78 | 15.07 |
| 8.28  | 20.35 | 21.00 | 20.21 | 18.76 | 14.11 |
| 8.56  | 19.30 | 21.58 | 19.35 | 18.25 | 14.44 |
| 9.01  | 18.49 | 23.32 | 17.07 | 19.91 | 12.42 |
| 9.25  | 17.71 | 22.24 | 18.33 | 21.10 | 11.29 |
| 10.41 | 15.03 | 25.90 | 15.38 |       |       |
| 12.21 | 12.55 | 28.31 | 13.38 |       |       |
| 13.03 | 11.42 | 30.38 | 12.00 |       |       |
| 14.15 | 9.85  | 33.94 | 8.73  |       |       |
| 15.34 | 8.69  | 42.24 | 5.88  |       |       |
| 16.11 | 7.46  |       |       |       |       |
| 17.52 | 6.60  |       |       |       |       |
| 18.52 | 6.29  |       |       |       |       |

| [Ch][Lac] |       | [Ch][Gal] |       | [Ch][Nic] |       | [Ch][Van] |       |
|-----------|-------|-----------|-------|-----------|-------|-----------|-------|
| 100·X     | 100·Y | 100·X     | 100·Y | 100·X     | 100·Y | 100·X     | 100·Y |
| 5.08      | 46.29 | 7.23      | 56.85 | 9.84      | 51.97 | 11.28     | 57.83 |
| 5.82      | 39.83 | 7.56      | 55.68 | 10.69     | 50.12 | 11.92     | 55.88 |
| 6.32      | 38.12 | 7.81      | 53.99 | 12.00     | 47.58 | 12.39     | 54.63 |
| 7.06      | 35.60 | 8.31      | 52.41 | 12.73     | 45.47 | 13.03     | 52.99 |
| 8.14      | 32.11 | 9.05      | 50.83 | 13.93     | 42.74 | 13.70     | 51.92 |
| 9.64      | 27.98 | 9.31      | 50.08 | 14.47     | 41.56 | 13.96     | 50.88 |
| 10.29     | 26.18 | 9.64      | 49.34 | 16.52     | 36.56 | 14.17     | 49.47 |
| 10.05     | 26.49 | 10.26     | 47.58 | 17.32     | 35.21 | 15.03     | 49.05 |
| 10.46     | 25.54 | 10.56     | 46.92 | 18.30     | 33.09 | 15.20     | 47.63 |
| 11.29     | 23.22 | 11.12     | 45.90 | 19.66     | 31.25 | 15.92     | 46.32 |
| 11.79     | 21.73 | 11.53     | 45.25 | 21.11     | 29.02 | 16.25     | 45.36 |
| 12.55     | 20.78 | 12.26     | 43.72 | 21.92     | 27.51 | 16.81     | 44.87 |
| 13.12     | 19.84 | 12.73     | 42.54 | 22.98     | 25.93 | 17.41     | 43.56 |
| 13.87     | 18.87 | 13.29     | 40.96 | 24.22     | 24.78 | 17.79     | 42.79 |
| 14.70     | 18.24 | 14.08     | 39.32 | 25.23     | 23.60 | 18.77     | 40.69 |
| 14.87     | 16.65 | 14.38     | 37.27 | 26.00     | 23.11 | 18.97     | 40.09 |
| 15.83     | 15.57 | 15.37     | 35.43 | 26.73     | 22.29 | 19.74     | 39.18 |
| 16.94     | 14.22 | 16.35     | 33.63 | 27.44     | 21.80 | 20.43     | 38.09 |
| 17.32     | 13.66 | 17.23     | 32.45 | 28.25     | 20.89 | 21.75     | 35.60 |
| 17.78     | 12.63 | 18.09     | 31.42 | 29.11     | 19.91 | 22.00     | 35.14 |
| 18.67     | 12.42 | 18.86     | 30.22 | 38.63     | 12.64 | 22.77     | 33.85 |
| 19.93     | 10.09 | 20.17     | 28.76 | 34.38     | 16.33 | 23.71     | 32.00 |
| 19.17     | 11.26 | 21.37     | 27.23 | 30.76     | 17.96 | 28.08     | 27.18 |
|           |       | 22.72     | 25.18 |           |       | 29.82     | 25.65 |
|           |       | 23.92     | 24.09 |           |       | 31.82     | 23.82 |
|           |       | 25.19     | 22.78 |           |       | 37.77     | 18.22 |
|           |       | 28.08     | 19.91 |           |       | 42.71     | 15.29 |
|           |       | 35.99     | 13.51 |           |       |           |       |

<sup>1</sup>The standard uncertainty of the measured percentage weight fraction is  $u(100 \cdot y) = u(100 \cdot x) = 0.066$ ,  $u(T) = 1$  °C. Relative standard uncertainty:  $u_r(p) = 1.5\%$

**Table S2.** Correlation parameters, standard deviations and determination coefficients ( $R^2$ ) of the salt/IL (X) + PPG400 (Y) + H<sub>2</sub>O ABS obtained by the Merchuk equation at 25°C and at p = 0.1 MPa)

| IL          | $A \pm \sigma$     | $B \pm \sigma$   | $C \pm \sigma$                   | $R^2$  |
|-------------|--------------------|------------------|----------------------------------|--------|
| [Ch][DHP]   | $145.34 \pm 4.88$  | $-0.66 \pm 0.02$ | $(7.20 \pm 1.44) \cdot 10^{-5}$  | 0.9962 |
| [Ch][DHCit] | $135.66 \pm 4.03$  | $-0.39 \pm 0.02$ | $(1.16 \pm 0.16) \cdot 10^{-5}$  | 0.9971 |
| [Ch]Cl      | $243.28 \pm 19.74$ | $-0.67 \pm 0.03$ | $(-8.10 \pm 8.22) \cdot 10^{-5}$ | 0.9955 |
| [Ch][Lac]   | $155.94 \pm 7.61$  | $-0.55 \pm 0.02$ | $(-2.89 \pm 0.72) \cdot 10^{-5}$ | 0.9966 |
| [Ch][Gal]   | $145.97 \pm 4.02$  | $-0.34 \pm 0.01$ | $(6.88 \pm 1.26) \cdot 10^{-6}$  | 0.9971 |
| [Ch][Nic]   | $180.72 \pm 7.33$  | $-0.38 \pm 0.01$ | $(4.43 \pm 1.00) \cdot 10^{-6}$  | 0.9976 |
| [Ch][Van]   | $190.05 \pm 4.77$  | $-0.35 \pm 0.01$ | $(3.22 \pm 0.46) \cdot 10^{-6}$  | 0.9987 |

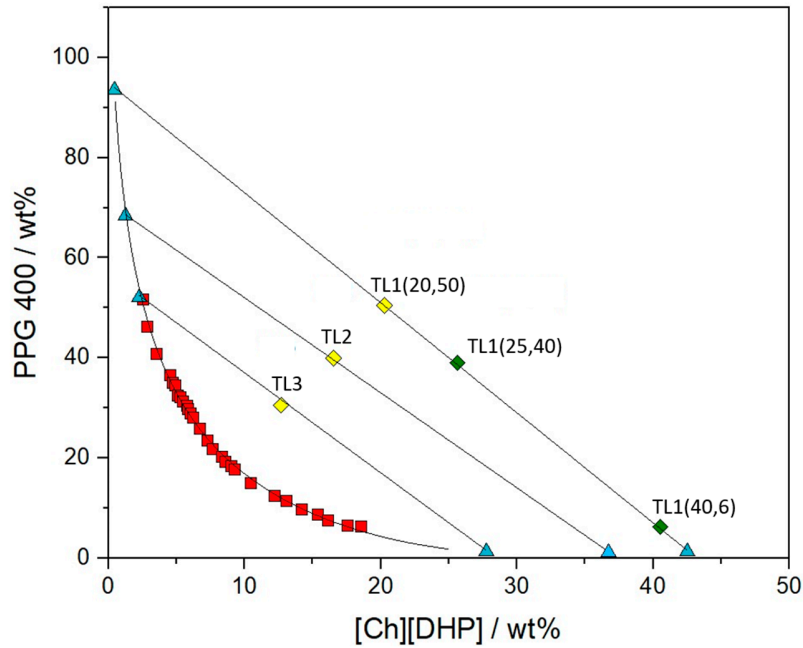

**Figure S3.** Ternary phase diagram composed of [Ch][DHP] + PPG 400 + H<sub>2</sub>O at 25°C with illustrated TLs; ■, binodal curve data; ▲, TL data; ◆ and ◆, initial ABS compositions.

**Table S3.** Experimental tie-lines data in percentage weight fraction for the ABS composed of ([Ch][DHP] + PPG400 (Y) + H<sub>2</sub>O (Z)) at 25°C, pH ~ 6, and 0.1 MPa and volume ratios (Vr).

| [Ch][DHP]/PPG400 | ABS composition |       | PPG-rich phases |       |       | IL-rich phases |       |       | TLL    | Vr  |
|------------------|-----------------|-------|-----------------|-------|-------|----------------|-------|-------|--------|-----|
|                  | 100·X           | 100·Y | 100·X           | 100·Y | 100·Z | 100·X          | 100·Y | 100·Z |        |     |
| TL1(20,50)       | 20.25           | 50.44 | 0.44            | 93.57 | 5.99  | 42.51          | 1.27  | 56.22 | 101.43 | 0.5 |
| TL1(25,40)       | 25.63           | 39.01 | 0.44            | 93.57 | 5.99  | 42.51          | 1.27  | 56.22 | 101.43 | 0.4 |
| TL1(40,6)        | 40.52           | 6.19  | 0.44            | 93.57 | 5.99  | 42.51          | 1.27  | 56.22 | 101.43 | 0.2 |
| TL2              | 16.54           | 39.93 | 1.25            | 68.41 | 30.34 | 36.72          | 1.09  | 62.19 | 76.09  | 0.5 |
| TL3              | 12.68           | 30.59 | 2.26            | 52.11 | 45.63 | 27.76          | 1.27  | 71.97 | 56.88  | 0.4 |

**Table S4.** The properties of the polyphenolic compounds.

| Compound    | Chemical structure                                                                  | <sup>1</sup> pK <sub>a1</sub> /pK <sub>a2</sub> | <sup>1</sup> logK <sub>ow</sub><br>(pH=7) | <sup>1</sup> HBA | <sup>1</sup> HBD |
|-------------|-------------------------------------------------------------------------------------|-------------------------------------------------|-------------------------------------------|------------------|------------------|
| Resveratrol | 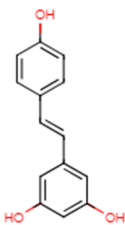  | 8.49                                            | 3.40                                      | 3                | 3                |
| Quercetin   |  | 7.58                                            | 2.70                                      | 7                | 4                |
| Gallic acid |  | 3.94                                            | -2.21                                     | 5                | 4                |

<sup>1</sup>from Chemicalize- online cheminformatics platform by ChemAxon's, <https://chemicalize.com/app/calculation>

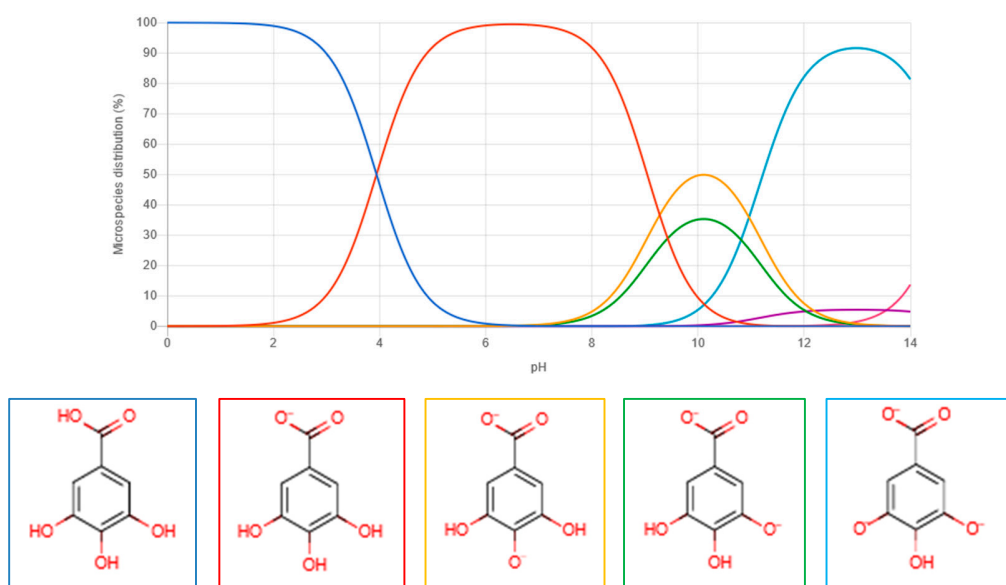

**Figure S4.** Speciation diagrams of gallic acid (from Chemicalize- online cheminformatics platform by ChemAxon's, <https://chemicalize.com/app/calculation>).



### a) RESVERATROL

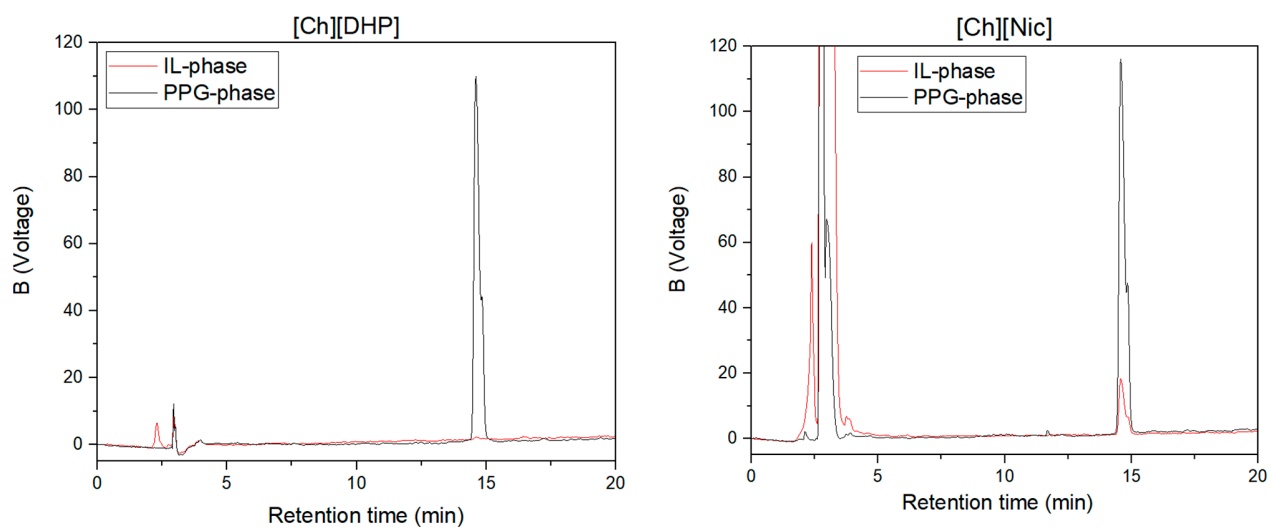

### b) QUERCETIN

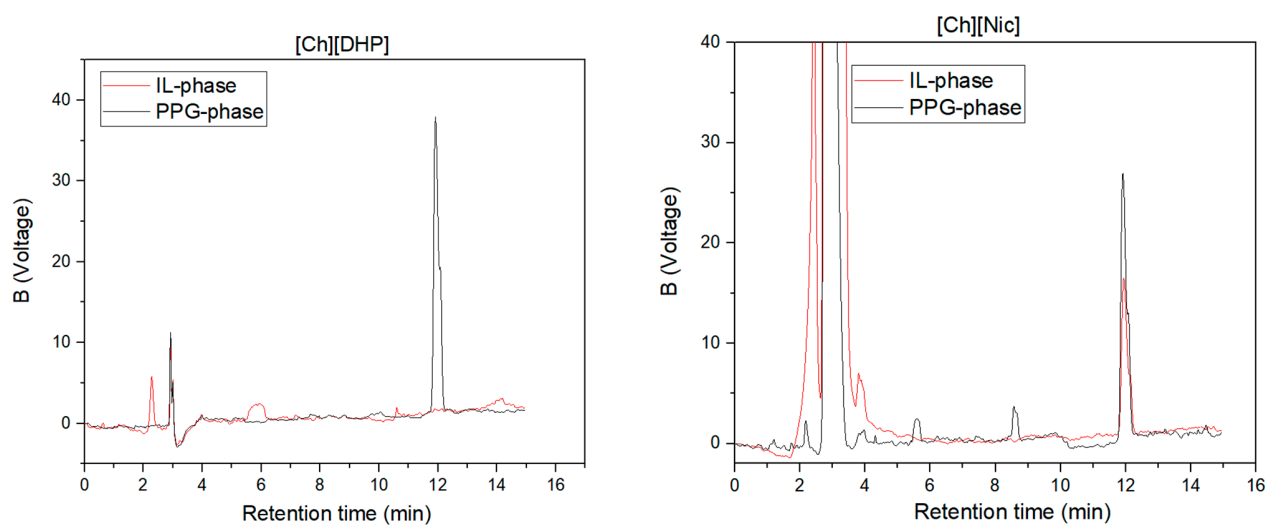

**Figure S5.** Chromatograms of investigated polyphenolic in [Ch][DHP] or [Ch][Nic] -rich phase (black line) and PPG400-rich phase (red line) at 280nm.

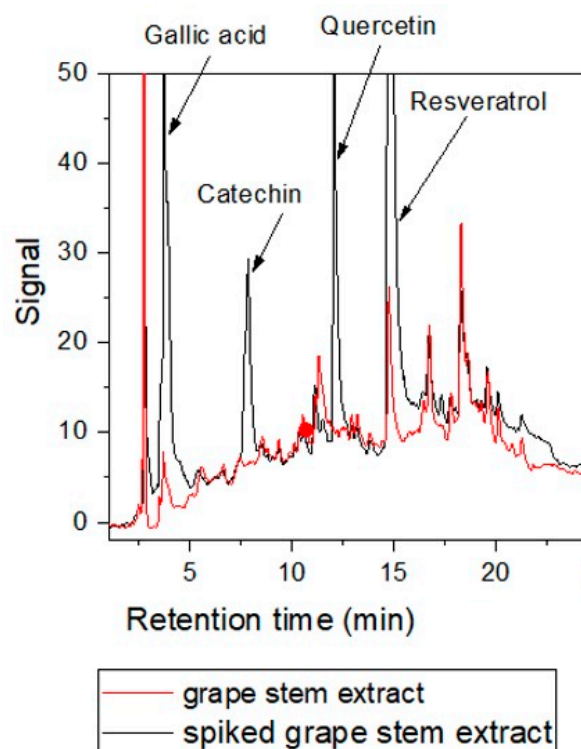

**Figure S6.** Chromatograms of grape stem extract (red line) and spiked grape stem extract (black line) in ethanol at 280nm.

- [1] K.E. Gutowski, G.A. Broker, H.D. Willauer, J.G. Huddleston, R.P. Swatloski, J.D. Holbrey, R.D. Rogers, Controlling the aqueous miscibility of ionic liquids: Aqueous biphasic systems of water-miscible ionic liquids and water-structuring salts for recycle, metathesis, and separations, *J. Am. Chem. Soc.*, 125 (22) (2003) 6632.
- [2] J.C. Merchuk, B.A. Andrews, J.A. Asenjo, Aqueous two-phase systems for protein separation, *J. Chromatogr. B Biomed. Sci. Appl.*, 711 (1–2) (1998) 285.
